# Supplementary material
Source: publisher site journal article supplement (https://www.dovepress.com/get_supplementary_file.php?f=supplementary_file_4_51969.pdf)
Supplement: Supplementary file 1 [file get_supplementary_file.php]

**Table S4. lists the predicted targets among a large number of target genes according to miRTar**

| p-value   | Fold-change | UniqueID      | Target genes                                                                         |
|-----------|-------------|---------------|--------------------------------------------------------------------------------------|
| 0.0497246 | 2.59        | hsa-miR-411   |                                                                                      |
| 0.0104239 | 2.17        | hsa-miR-663   | CALB2 CTF KIAA0140 ARID3B LYPLA2 IQSEC2 HRG22 KIAA1196 SAT2                          |
| 0.0061796 | 2.1         | hsa-miR-622   | ACVR2B OAS2 NUDT5                                                                    |
| 0.0100798 | 1.83        | hsa-miR-647   | FLOT2 CTF D8 KIAA0140 ARID3B IQSEC2 KIAA1196                                         |
| 0.0261367 | 1.81        | hsa-miR-376a* | ACVR2B                                                                               |
| 0.0145554 | 1.77        | HS_188        |                                                                                      |
| 0.0478704 | 1.45        | HS_254        |                                                                                      |
| 0.0462693 | 0.69        | hsa-miR-589   | OAS2 DLL1 VEZATIN LIN28B                                                             |
| 0.0297875 | 0.66        | hsa-miR-517*  |                                                                                      |
| 0.0198896 | 0.63        | hsa-miR-107   | ACVR2B OAS2 KIAA0140 LYPLA2 DLL1 VEZATIN KIAA1196                                    |
| 0.0122158 | 0.57        | HS_279_a      |                                                                                      |
| 0.0359646 | 0.57        | HS_160        |                                                                                      |
| 0.0373665 | 0.57        | hsa-miR-195   | ACVR2B PAPSS2 KIAA0140 LYPLA2 HRG22 VEZATIN KIAA1196                                 |
| 0.0101263 | 0.56        | hsa-miR-187   | ACVR2B PAPSS2 IQSEC2                                                                 |
| 0.0432036 | 0.49        | HS_303_b      |                                                                                      |
| 0.0319011 | 0.31        | hsa-miR-363   |                                                                                      |
| 0.0108576 | 0.27        | hsa-miR-497   | ACVR2B FLOT2 PAPSS2 KIAA0140 ARID3B LYPLA2 IQSEC2 HRG22 DLL1 VEZATIN KIAA1196 LIN28B |
